# Supplementary material for: Investigating the Mechanical Characteristics of Bone-Metal Implant Interface Using in situ Synchrotron Tomographic Imaging
Source: Front Bioeng Biotechnol. 2019 Jan 21;6:208. doi: 10.3389/fbioe.2018.00208 (PMC6348316; doi:10.3389/fbioe.2018.00208)
Supplement: Data Sheet S1 — 3D representation of the contact between the cortical bone and the screw for a sample from the control group. [file Data_Sheet_1.ZIP]

Archive with 1 entries (1 files):
- S1_Ctrl_contact_cortex_screw_movie.avi
