# Supplementary material for: Investigating the Mechanical Characteristics of Bone-Metal Implant Interface Using in situ Synchrotron Tomographic Imaging
Source: Front Bioeng Biotechnol. 2019 Jan 21;6:208. doi: 10.3389/fbioe.2018.00208 (PMC6348316; doi:10.3389/fbioe.2018.00208)
Supplement: Data Sheet S5 — Image sequence of one sample cut displaying the 3 last load steps before failure, illustrating the crack appearance and propagation for a sample ranked in Crack Type 2 group, i.e., rupture through a large cortical crack. [file Data_Sheet_5.ZIP]

Archive with 1 entries (1 files):
- S5_CrackType2_gif.gif
